# Supplementary material for: A median fin derived from the lateral plate mesoderm and the origin of paired fins
Source: Springer Nature journal article supplement (doi:10.1038/s41586-023-06100-w), 2023-05-24
Supplement: MOESM1 [file 41586_2023_6100_MOESM1_ESM.pdf]

## Reporting Summary

Nature Portfolio wishes to improve the reproducibility of the work that we publish. This form provides structure for consistency and transparency in reporting. For further information on Nature Portfolio policies, see our [Editorial Policies](#) and the [Editorial Policy Checklist](#).

### Statistics

For all statistical analyses, confirm that the following items are present in the figure legend, table legend, main text, or Methods section.

n/a Confirmed

- |                                     |                                     |                                                                                                                                                                                                                                                            |
|-------------------------------------|-------------------------------------|------------------------------------------------------------------------------------------------------------------------------------------------------------------------------------------------------------------------------------------------------------|
| <input type="checkbox"/>            | <input checked="" type="checkbox"/> | The exact sample size ( $n$ ) for each experimental group/condition, given as a discrete number and unit of measurement                                                                                                                                    |
| <input type="checkbox"/>            | <input checked="" type="checkbox"/> | A statement on whether measurements were taken from distinct samples or whether the same sample was measured repeatedly                                                                                                                                    |
| <input type="checkbox"/>            | <input checked="" type="checkbox"/> | The statistical test(s) used AND whether they are one- or two-sided<br><i>Only common tests should be described solely by name; describe more complex techniques in the Methods section.</i>                                                               |
| <input checked="" type="checkbox"/> | <input type="checkbox"/>            | A description of all covariates tested                                                                                                                                                                                                                     |
| <input checked="" type="checkbox"/> | <input type="checkbox"/>            | A description of any assumptions or corrections, such as tests of normality and adjustment for multiple comparisons                                                                                                                                        |
| <input type="checkbox"/>            | <input checked="" type="checkbox"/> | A full description of the statistical parameters including central tendency (e.g. means) or other basic estimates (e.g. regression coefficient) AND variation (e.g. standard deviation) or associated estimates of uncertainty (e.g. confidence intervals) |
| <input type="checkbox"/>            | <input checked="" type="checkbox"/> | For null hypothesis testing, the test statistic (e.g. $F$ , $t$ , $r$ ) with confidence intervals, effect sizes, degrees of freedom and $P$ value noted<br><i>Give <math>P</math> values as exact values whenever suitable.</i>                            |
| <input checked="" type="checkbox"/> | <input type="checkbox"/>            | For Bayesian analysis, information on the choice of priors and Markov chain Monte Carlo settings                                                                                                                                                           |
| <input checked="" type="checkbox"/> | <input type="checkbox"/>            | For hierarchical and complex designs, identification of the appropriate level for tests and full reporting of outcomes                                                                                                                                     |
| <input checked="" type="checkbox"/> | <input type="checkbox"/>            | Estimates of effect sizes (e.g. Cohen's $d$ , Pearson's $r$ ), indicating how they were calculated                                                                                                                                                         |

Our web collection on [statistics for biologists](#) contains articles on many of the points above.

### Software and code

Policy information about [availability of computer code](#)

Data collection

Zeiss ZEN Blue 3.6  
Fiji ImageJ ver. 1.52p  
IMARIS 9.9.1 (Oxford Instruments)  
Avizo 3D software (ThermoFisher Scientific)

Data analysis

GraphPad Prism 9

For manuscripts utilizing custom algorithms or software that are central to the research but not yet described in published literature, software must be made available to editors and reviewers. We strongly encourage code deposition in a community repository (e.g. GitHub). See the Nature Portfolio [guidelines for submitting code & software](#) for further information.

### Data

Policy information about [availability of data](#)

All manuscripts must include a [data availability statement](#). This statement should provide the following information, where applicable:

- Accession codes, unique identifiers, or web links for publicly available datasets
- A description of any restrictions on data availability
- For clinical datasets or third party data, please ensure that the statement adheres to our [policy](#)

The authors confirm that all relevant data are provided in the results section of this paper, in its Extended Data files and in the Source Data file. The data for

measurements of fin size and cell number in Extended Data Figure 3m-o are also available in Figshare with the identifier <https://doi.org/10.6084/m9.figshare.22269769>.

## Human research participants

Policy information about [studies involving human research participants and Sex and Gender in Research](#).

Reporting on sex and gender N/A

Population characteristics N/A

Recruitment N/A

Ethics oversight N/A

Note that full information on the approval of the study protocol must also be provided in the manuscript.

## Field-specific reporting

Please select the one below that is the best fit for your research. If you are not sure, read the appropriate sections before making your selection.

☐ Life sciences ☐ Behavioural & social sciences ☒ Ecological, evolutionary & environmental sciences

For a reference copy of the document with all sections, see [nature.com/documents/nr-reporting-summary-flat.pdf](https://www.nature.com/documents/nr-reporting-summary-flat.pdf)

## Ecological, evolutionary & environmental sciences study design

All studies must disclose on these points even when the disclosure is negative.

Study description Expression analysis of tissue developmental origin across multiple species

Research sample  
Danio rerio (WT strain: AB)  
Oryzias latipes (WT strain: Cab)  
Polyodon spathula  
Xenopus tropicalis  
Xenopus laevis  
Petromyzon marinus  
Carassius auratus (Ranchu strain)

Sampling strategy n>=5 for all statistical analyses on fin size counts. All expression experiments were performed multiple times on different animal batches

Data collection Data collected by microscopy

Timing and spatial scale Developmentally relevant timepoints chosen

Data exclusions Nil

Reproducibility All expression experiments were performed multiple times on different animal batches. Findings were consistent across different repeat experiments

Randomization Embryos selected at random for imaging

Blinding NA

Did the study involve field work? ☐ Yes ☒ No

## Reporting for specific materials, systems and methods

We require information from authors about some types of materials, experimental systems and methods used in many studies. Here, indicate whether each material, system or method listed is relevant to your study. If you are not sure if a list item applies to your research, read the appropriate section before selecting a response.

## Materials &amp; experimental systems

|                                     |                                                                 |
|-------------------------------------|-----------------------------------------------------------------|
| n/a                                 | Involved in the study                                           |
| <input type="checkbox"/>            | <input checked="" type="checkbox"/> Antibodies                  |
| <input checked="" type="checkbox"/> | <input type="checkbox"/> Eukaryotic cell lines                  |
| <input checked="" type="checkbox"/> | <input type="checkbox"/> Palaeontology and archaeology          |
| <input type="checkbox"/>            | <input checked="" type="checkbox"/> Animals and other organisms |
| <input checked="" type="checkbox"/> | <input type="checkbox"/> Clinical data                          |
| <input checked="" type="checkbox"/> | <input type="checkbox"/> Dual use research of concern           |

## Methods

|                                     |                                                 |
|-------------------------------------|-------------------------------------------------|
| n/a                                 | Involved in the study                           |
| <input checked="" type="checkbox"/> | <input type="checkbox"/> ChIP-seq               |
| <input checked="" type="checkbox"/> | <input type="checkbox"/> Flow cytometry         |
| <input checked="" type="checkbox"/> | <input type="checkbox"/> MRI-based neuroimaging |

## Antibodies

|                 |                                                                                                                                                                                                                                                                                                                                                                                                                                                                                                                                                                                                                                                                    |
|-----------------|--------------------------------------------------------------------------------------------------------------------------------------------------------------------------------------------------------------------------------------------------------------------------------------------------------------------------------------------------------------------------------------------------------------------------------------------------------------------------------------------------------------------------------------------------------------------------------------------------------------------------------------------------------------------|
| Antibodies used | anti-Col2A1 (II-II6B3, DSHB)<br>anti-EGFP (TP401, Torrey Pines)<br>zns-5 (AB_10013796, ZIRC)<br>anti-SM22 alpha/Transgelin (ab14106, Abcam)<br>Alexa Fluor-488 Donkey anti-rabbit, Invitrogen, A21206<br>Alexa Fluor-647 Donkey anti-rabbit, Invitrogen, A31573<br>Alexa Fluor-546 Donkey anti-mouse, Invitrogen, A10036<br>Alexa Fluor-647 Donkey anti-mouse, Invitrogen, A31571                                                                                                                                                                                                                                                                                  |
| Validation      | See validation and associated references on the antibody supplier websites:<br><a href="https://dshb.biology.uiowa.edu/II-II6B3">https://dshb.biology.uiowa.edu/II-II6B3</a><br><a href="http://chemokine.com/Houston/rat&amp;other/GFP.PDF">http://chemokine.com/Houston/rat&amp;other/GFP.PDF</a><br><a href="https://zfin.org/ZDB-ATB-081002-37">https://zfin.org/ZDB-ATB-081002-37</a><br><a href="https://www.abcam.com/tag/Intransgelin-antibody-ab14106.html">https://www.abcam.com/tag/Intransgelin-antibody-ab14106.html</a><br><a href="https://www.thermofisher.com/antibody/secondary/query">https://www.thermofisher.com/antibody/secondary/query</a> |

## Animals and other research organisms

Policy information about [studies involving animals](#); [ARRIVE guidelines](#) recommended for reporting animal research, and [Sex and Gender in Research](#)

|                         |                                                                                                                                                                                                                                                                                                                                                                                                                                             |
|-------------------------|---------------------------------------------------------------------------------------------------------------------------------------------------------------------------------------------------------------------------------------------------------------------------------------------------------------------------------------------------------------------------------------------------------------------------------------------|
| Laboratory animals      | Danio rerio (WT strain: AB)<br>Oryzias latipes (WT strain: Cab)<br>Polyodon spathula<br>Xenopus tropicalis<br>Xenopus laevis<br>Petromyzon marinus<br>Carassius auratus (Ranchu strain)                                                                                                                                                                                                                                                     |
| Wild animals            | No wild animals were used in the study.                                                                                                                                                                                                                                                                                                                                                                                                     |
| Reporting on sex        | Most experiments were conducted during larval stages before sexual dimorphism occurs. Otherwise gender is reported for adults (in Extended Data Figure 9)                                                                                                                                                                                                                                                                                   |
| Field-collected samples | No field collected samples were used in the study                                                                                                                                                                                                                                                                                                                                                                                           |
| Ethics oversight        | IMCB, A*STAR, Singapore (IACUC #140924)<br>Nanyang Technological University (IACUC #A18002)<br>CU Anschutz Medical Campus (protocol number 979)<br>National University of Singapore (IACUC #BR19-0120 and #BR22-1497)<br>James Madison University (IACUC #20-1601)<br>California Institute of Technology (IACUC #1436)<br>University of Manchester and the Home Office (PFDA14F2D)<br>Monash Animal Ethics Committee under license (#30347) |

Note that full information on the approval of the study protocol must also be provided in the manuscript.
